RESEARCH ARTICLE

# Household air pollution from use of cooking fuel and under-five mortality: The role of breastfeeding status and kitchen location in Pakistan

Sabrina Naz<sup>1\*</sup>, Andrew Page<sup>1</sup>, Kingsley Emwinyore Agho<sup>2</sup>

**1** Centre of Health Research, School of Medicine, Western Sydney University, Campbelltown Campus, Penrith, New South Wales, Australia, **2** School of Science and Health, Western Sydney University, Campbelltown Campus, Penrith, New South Wales, Australia

✉ These authors contributed equally to this work.

\* [sabrinanaz@gmail.com](mailto:sabrinanaz@gmail.com)

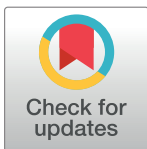

**OPEN ACCESS**

**Citation:** Naz S, Page A, Agho KE (2017)

Household air pollution from use of cooking fuel and under-five mortality: The role of breastfeeding status and kitchen location in Pakistan. PLoS ONE 12(3): e0173256. doi:10.1371/journal.pone.0173256

**Editor:** Kevin Mortimer, Liverpool School of Tropical Medicine, UNITED KINGDOM

**Received:** December 14, 2016

**Accepted:** February 17, 2017

**Published:** March 9, 2017

**Copyright:** © 2017 Naz et al. This is an open access article distributed under the terms of the [Creative Commons Attribution License](https://creativecommons.org/licenses/by/4.0/), which permits unrestricted use, distribution, and reproduction in any medium, provided the original author and source are credited.

**Data Availability Statement:** The datasets analysed during the current study are publicly available in The DHS Program, <http://dhsprogram.com/data/>, to registered users.

**Funding:** The research received no specific grant from any funding agency in the public, commercial or not-for-profit sectors.

**Competing interests:** The authors have declared that no competing interests exist.

## Abstract

Household air pollution (HAP) mainly from cooking fuel is one of the major causes of respiratory illness and deaths among young children in low and middle-income countries like Pakistan. This study investigates for the first time the association between HAP from cooking fuel and under-five mortality using the 2013 Pakistan Demographic and Health Survey (PDHS) data. Multi-level logistic regression models were used to examine the association between HAP and under-five mortality in a total of 11,507 living children across four age-groups (neonatal aged 0–28 days, post-neonatal aged 1–11 months, child aged 12–59 months and under-five aged 0–59 months). Use of cooking fuel was weakly associated with total under-five mortality (OR = 1.22, 95%CI = 0.92–1.64,  $P = 0.170$ ), with stronger associations evident for sub-group analyses of children aged 12–59 months (OR = 1.98, 95%CI = 0.75–5.25,  $P = 0.169$ ). Strong associations between use of cooking fuel and mortality were evident (ORs >5) in those aged 12–59 months for households without a separate kitchen using polluting fuels, and in children whose mother never breastfed. The results of this study suggest that HAP from cooking fuel is associated with a modest increase in the risk of death among children under five years of age in Pakistan, but particularly in those aged 12–59 months, and those living in poorer socioeconomic conditions. To reduce exposure to cooking fuel which is a preventable determinant of under-five mortality in Pakistan, the challenge remains to promote behavioural interventions such as breastfeeding in infancy period, keeping young children away from the cooking area, and improvements in housing and kitchen design.

## Introduction

Pakistan is the sixth most populous country in the world located in north-west South Asia [1]. Pakistan is an agricultural country, and nearly 64% of the population mainly live in rural areas

[1], where access to commercial and clean energy resources is limited and traditional ways of using solid fuels (such as wood, straw/shrubs/grass, animal dung, charcoal, and coal) are the only available options for domestic cooking fuel [2]. Almost 87% of rural and 13% of urban households in Pakistan use solid fuels for cooking [1], and when these fuels are burnt in open fire produces health-damaging pollutants and chemicals. [3–5].

Household air pollution (HAP) from unprocessed fuel is a substantial cause of respiratory illness and death and remains a major public health concern in low and middle-income countries [6], and globally almost 4.3 million deaths annually have been attributed to HAP [7]. Children less than five years of age are the most vulnerable to HAP related illness such as respiratory infections, due to their proximity to domestic cooking [8–10]. Pneumonia, which is caused by ARI, is still a leading cause of death among children under age five in Pakistan [1]. The under-five mortality rate in Pakistan declined from 139 per 1,000 live births in 1990 to 86 in 2013 [11]; which remains above the Millennium Development Goal 4 (MDG4) target that is to reduce under-five mortality by two-thirds (46 per 1,000 live births) [12]. Disability-adjusted life years (DALYs) from the Global Burden of Diseases (GBD) study shows that 10% of the total burden of disease for all ages in the country has been associated with ARI [13], and according to the World Health Organization (WHO) 9% of the total burden of diseases in Pakistan has been attributable to HAP [14].

There have been few studies from Pakistan investigating the association between HAP and the health of young children, with most limited to a particular health outcome (e.g. low birth weight/acute respiratory infection) or specific geographical area or regional population. [3, 15–17]. Only two studies have examined the effect of HAP on non-fatal respiratory diseases among under-five children [3, 17]. To date, no previous studies from Pakistan have examined the effect of HAP from use of cooking fuel on under-five mortality using large-scale and nationally representative data, and also have not considered the role of potential environmental and behavioural factors that might affect the level of exposure to cooking fuel. Accordingly, this study investigated the association between HAP from the use of cooking fuel and under-five mortality (classified as neonatal 0–28 days, post-neonatal 1–11 months, child 12–59 months and under-five 0–59 months), and assessed how observed associations were affected by key environmental and behavioural factors in Pakistan.

## Materials and methods

### Data sources

The most recent nationally representative Pakistan Demographic and Health Survey (PDHS) dataset for the year 2013 was used for this study, collected with approval from the DHS program (<http://www.dhsprogram.com/>). The PDHS was conducted in Pakistan with the collaboration of the global DHS program. The survey was implemented by the National Institute of Population Studies (NIPS) with technical and logistical support from the ICF international of Calverton, Maryland, USA and financial support provided by the United States Agency for International Development (USAID) [1]. Demographic and health data of urban and rural areas were collected by interviewing ever-married women and men aged 15–49 years using a stratified sample of households based on a two-stage cluster design [1].

A total of 13,558 eligible women of reproductive age of 15–49 years were included in the sample with a response rate of 93.1%. This present study was based on information related to 11,507 singleton live-born children, of whom 768 died in the 5-years prior to the survey date. Data relating to under-five mortality (classified as neonatal 0–28 days, post-neonatal 1–11 months, child 12–59 months and under-five 0–59 months) was restricted to this period of five

years to minimise recall bias of child birth and death information which was self-reported by the mother.

## Study outcomes

The analysis for under-five mortality was carried out for three separate age groups (as a proportion of total live births): neonatal mortality (number of deaths during the first 28 days of life, 0–28 days), post-neonatal mortality (number of deaths between one month and the first birthday, 1–11 months), child mortality (number of deaths between age one and five, 12–59 months). Analyses combining these three groups for under-five mortality (number of deaths between birth and the fifth birthday, 0–59 months) were also conducted.

The outcome variables were dichotomous for the analysis, where age at death was either 'yes' (= 1) or 'no' (= 0).

## Exposure to cooking fuel

The type of cooking fuel was the main exposure variable in this study. In PDHS, the mothers were asked, "What type of fuel does your household mainly use for cooking?", and 10 types of cooking fuels were reported in response. These fuels were grouped into two categories in this analysis on the basis of exposure to cooking smoke: "clean fuels" including electricity, liquid petroleum gas (LPG), natural gas and biogas and "polluting fuels" including kerosene, coal/lignite, charcoal, wood, straw/shrubs/grass and animal dung. Kerosene was categorised in the polluting fuels group in this study as some previous studies on HAP have reported kerosene as a polluting fuel and have shown significant associations between under-five mortality or respiratory illness among young children and use of kerosene fuel in the household [18–21].

## Potential confounders

A number of indicators of socio-economic status were incorporated in the study including, place of residence (categorized as "urban" or "rural"), household wealth index ("high income", "middle income" or "low income"), mother's education ("secondary or higher", "primary" or "no education"), mother's working status ("not working" or "working"), smoking status of mother (categorized as "yes" or "no"), floor material of household ("cement/carpet" or "earth/sand") and wall material of household ("cement/brick" or "non-cement/non-brick"). These socio-economic status variables have previously been described as potential confounders for the association between HAP and under-five mortality [20–30]. "Low income" represented the bottom 40% of households, "middle income" represented the middle 40% of households, and "high income" represented the top 20% of households, based on the method defined by Filmer and Pritchett [31]. Mother's age (categorised as <30, 30–39 and 40–49 years) and sex of the child ("female" or "male") were also considered as covariates in this study.

Breastfeeding has previously been presented to provide important protection against infectious diseases and may be associated with lower under-five mortality, especially in neonatal and infancy period [21, 23, 25, 26, 32–36] and reduce the risk of disease associated with HAP. Likewise, a household without a separate kitchen for cooking has also previously been associated as a proxy measure of a greater level of exposure to use of cooking fuel, based on proximity to polluting fuels [25, 28, 37–41]. Breastfeeding status of children (categorised as ever breastfed "yes" or "no") and location of the kitchen either inside the house or separate from buildings/outdoors (categorised as separate kitchen "yes" or "no") were taken into account *a priori* as factors that may indicate different levels of exposure to polluting fuels. (Descriptive characteristics of study factors are provided in a [S1 Table](#)).

## Statistical analysis

Neonatal, post-neonatal, child and under-five mortality incidence proportions were calculated by following a similar approach of the DHS program provided by Rutstien and Rojas [42]. Multilevel logistic regression models were used to investigate the association between type of cooking fuels and neonatal, post-neonatal, child and under-five mortality adjusted for the selected covariates of place of residence, wealth index, mother's age, mother's education, mother's working status, sex of child, breastfeeding status, wall material and floor material of household, location of kitchen and smoking status of mothers.

Analyses stratified by breastfeeding status and by the location of the kitchen were also conducted to define whether the magnitude of the effect of the cooking fuel on mortality outcomes differed across different levels of these two variables. Breastfeeding status and location of the kitchen were each combined with the type of cooking fuel as composite ordinal variables to examine different levels of exposure to cooking fuel for neonatal, post-neonatal, child and under-five mortality outcomes.

The weighted incidence proportion estimates of mortality were calculated using the "SVY" command to adjust for the cluster sampling survey design and weights. Random effects multi-level logistic regression models were conducted by using the "xtlogit" command. All analyses were carried out in STATA version 13.1 (Stata Corp: College Station, TX, USA).

## Ethics

Before the Demography and Health Survey (DHS) were conducted, this survey sought and obtained the required ethical approvals from ethics committees in Pakistan. Informed consent was obtained from study participants before their participation in the surveys. Publicly available, de-identified datasets were used in this study following approval from The DHS Program to download and use the data.

## Results

Use of polluting fuels (wood, straw/shrubs/grass, animal dung, charcoal, coal/lignite, kerosene) for cooking was associated with a higher risk of child mortality (OR = 1.98, 95%CI = 0.75–5.25,  $P = 0.169$ ), after adjusting for place of residence, household wealth, mother's age, mother's education, mother's working status, sex of child, breastfeeding status, floor and wall material of household, location of kitchen and smoking status of mother (Table 1). Effect sizes of smaller magnitude were evident for post-neonatal mortality (OR = 1.31, 95%CI = 0.75–2.27,  $P = 0.342$ ) followed by neonatal mortality (OR = 1.09, 95%CI = 0.77–1.54,  $P = 0.643$ ) (Table 1). The association between use of polluting fuels for cooking (compared to no polluting fuels) and overall under-five mortality was (OR = 1.22, 95%CI = 0.92–1.64,  $P = 0.170$ ) after adjusting for covariates (Fig 1). A sub-analysis was conducted to investigate the association between different fuel type with under-five mortality and found slightly higher association for use of straw/shrubs/grass, animal dung (OR = 1.39, 95%CI = 0.96–2.01,  $P = 0.081$ ) followed by use of kerosene, coal/lignite, charcoal (OR = 1.34, 95%CI = 0.72–2.49,  $P = 0.350$ ) and use of wood (OR = 1.20, 95%CI = 0.89–1.60,  $P = 0.234$ ) compared to use of electricity, LPG/natural gas, biogas associated with total under-five mortality in this study after adjustment for selected covariates (data not shown).

Stratified analyses to investigate different levels of exposure to use of cooking fuel found more than 3-fold higher risk of under-five mortality in children whose mother never breastfed and used polluting fuels for cooking (compared to breastfeeding mother who used clean fuels), with similar associations evident for neonatal mortality (OR = 3.34, 95%CI = 2.21–5.04,  $P < 0.001$ ) and post-neonatal mortality (OR = 3.39, 95%CI = 1.81–6.36,  $P < 0.001$ ) (Tables 2 & 3).

**Table 1. HAP from cooking fuels associated with neonatal, post-neonatal and child mortality in Pakistan.**

| Study factors                     | Neonatal       |                          |                        |         | Post-neonatal  |                          |                        |         | Child          |                          |                        |         |
|-----------------------------------|----------------|--------------------------|------------------------|---------|----------------|--------------------------|------------------------|---------|----------------|--------------------------|------------------------|---------|
|                                   | n <sup>a</sup> | Deaths /1000 live births | OR <sup>b</sup> 95% CI | P value | n <sup>a</sup> | Deaths /1000 live births | OR <sup>b</sup> 95% CI | P value | n <sup>a</sup> | Deaths /1000 live births | OR <sup>b</sup> 95% CI | P value |
| <b>Type of Cooking Fuel</b>       |                |                          |                        |         |                |                          |                        |         |                |                          |                        |         |
| Clean fuel <sup>c,d</sup>         | 136            | 34.8                     | 1.00                   |         | 49             | 12.3                     | 1.00                   |         | 12             | 3.0                      | 1.00                   |         |
| Polluting fuel <sup>e</sup>       | 367            | 51.7                     | 1.09 (0.77–1.54)       | 0.643   | 145            | 19.8                     | 1.31 (0.75–2.27)       | 0.342   | 59             | 8.0                      | 1.98 (0.75–5.25)       | 0.169   |
| <b>Place of Residence</b>         |                |                          |                        |         |                |                          |                        |         |                |                          |                        |         |
| Urban <sup>c</sup>                | 178            | 38.2                     | 1.00                   |         | 63             | 13.2                     | 1.00                   |         | 27             | 5.6                      | 1.00                   |         |
| Rural                             | 325            | 51.3                     | 1.04 (0.77–1.40)       | 0.789   | 131            | 20.1                     | 0.70 (0.45–1.09)       | 0.110   | 44             | 6.6                      | 0.58 (0.29–1.14)       | 0.111   |
| <b>Wealth Index</b>               |                |                          |                        |         |                |                          |                        |         |                |                          |                        |         |
| High income <sup>c</sup>          | 136            | 32.9                     | 1.00                   |         | 44             | 10.4                     | 1.00                   |         | 13             | 3.1                      | 1.00                   |         |
| Middle income                     | 95             | 44.8                     | 1.20 (0.84–1.72)       | 0.324   | 35             | 16.1                     | 1.31 (0.72–2.38)       | 0.379   | 10             | 4.5                      | 0.80 (0.27–2.32)       | 0.677   |
| Low income                        | 272            | 57.2                     | 1.58 (1.01–2.47)       | 0.047   | 115            | 23.4                     | 1.89 (0.92–3.86)       | 0.083   | 48             | 9.6                      | 2.07 (0.68–6.33)       | 0.201   |
| <b>Mother's Age</b>               |                |                          |                        |         |                |                          |                        |         |                |                          |                        |         |
| 40–49 <sup>c</sup>                | 51             | 69.7                     | 1.00                   |         | 12             | 15.6                     | 1.00                   |         | 5              | 6.4                      | 1.00                   |         |
| <30                               | 244            | 41.1                     | 0.82 (0.57–1.20)       | 0.309   | 104            | 17.1                     | 1.50 (0.73–3.06)       | 0.266   | 39             | 6.3                      | 2.17 (0.65–7.20)       | 0.206   |
| 30–39                             | 208            | 48.0                     | 0.88 (0.60–1.27)       | 0.483   | 78             | 17.5                     | 1.40 (0.69–2.86)       | 0.355   | 27             | 6.0                      | 1.51 (0.44–5.14)       | 0.511   |
| <b>Mother's Education</b>         |                |                          |                        |         |                |                          |                        |         |                |                          |                        |         |
| Secondary/Higher <sup>c</sup>     | 98             | 30.9                     | 1.00                   |         | 27             | 8.3                      | 1.00                   |         | 4              | 1.2                      | 1.00                   |         |
| Primary                           | 77             | 49.0                     | 1.19 (0.83–1.70)       | 0.351   | 33             | 20.4                     | 1.88 (1.07–3.31)       | 0.029   | 8              | 4.9                      | 3.45 (0.84–14.13)      | 0.085   |
| No education                      | 328            | 52.4                     | 1.27 (0.92–1.74)       | 0.140   | 134            | 20.8                     | 1.31 (0.77–2.22)       | 0.316   | 59             | 9.0                      | 6.20 (1.77–21.80)      | 0.004   |
| <b>Mother's Working Status</b>    |                |                          |                        |         |                |                          |                        |         |                |                          |                        |         |
| Working <sup>c</sup>              | 135            | 65.7                     | 1.00                   |         | 50             | 23.4                     | 1.00                   |         | 21             | 9.7                      | 1.00                   |         |
| Not working                       | 368            | 41.3                     | 0.77 (0.60–0.99)       | 0.041   | 144            | 15.8                     | 0.66 (0.45–0.97)       | 0.033   | 50             | 5.4                      | 0.83 (0.44–1.57)       | 0.570   |
| <b>Sex of Child</b>               |                |                          |                        |         |                |                          |                        |         |                |                          |                        |         |
| Female <sup>c</sup>               | 255            | 47.3                     | 1.00                   |         | 97             | 17.5                     | 1.00                   |         | 33             | 5.9                      | 1.00                   |         |
| Male                              | 248            | 44.2                     | 0.90 (0.73–1.10)       | 0.308   | 97             | 16.8                     | 1.10 (0.79–1.54)       | 0.563   | 38             | 6.5                      | 1.09 (0.63–1.87)       | 0.760   |
| <b>Breastfeeding Status</b>       |                |                          |                        |         |                |                          |                        |         |                |                          |                        |         |
| Ever breastfed <sup>c</sup>       | 137            | 22.3                     | 1.00                   |         | 60             | 9.6                      | 1.00                   |         | 29             | 4.6                      | 1.00                   |         |
| Never breastfed                   | 366            | 75.3                     | 3.20 (2.55–4.02)       | <0.001  | 134            | 26.3                     | 2.54 (1.78–3.62)       | <0.001  | 42             | 8.1                      | 2.31 (1.32–4.05)       | 0.003   |
| <b>Household's Floor Material</b> |                |                          |                        |         |                |                          |                        |         |                |                          |                        |         |

(Continued)

Table 1. (Continued)

| Study factors                    | Neonatal       |                          |                        |         | Post-neonatal  |                          |                        |         | Child          |                          |                        |         |
|----------------------------------|----------------|--------------------------|------------------------|---------|----------------|--------------------------|------------------------|---------|----------------|--------------------------|------------------------|---------|
|                                  | n <sup>a</sup> | Deaths /1000 live births | OR <sup>b</sup> 95% CI | P value | n <sup>a</sup> | Deaths /1000 live births | OR <sup>b</sup> 95% CI | P value | n <sup>a</sup> | Deaths /1000 live births | OR <sup>b</sup> 95% CI | P value |
| Cement/carpet <sup>c</sup>       | 211            | 38.4                     | 1.00                   |         | 67             | 11.9                     | 1.00                   |         | 29             | 5.1                      | 1.00                   |         |
| Earth/sand                       | 273            | 53.4                     | 0.89(0.65–1.22)        | 0.478   | 119            | 22.6                     | 0.68 (0.44–1.04)       | 0.074   | 39             | 7.3                      | 0.46 (0.22–0.95)       | 0.037   |
| <b>Household's Wall Material</b> |                |                          |                        |         |                |                          |                        |         |                |                          |                        |         |
| Cement/brick <sup>c</sup>        | 274            | 42.5                     | 1.00                   |         | 93             | 14.0                     | 1.00                   |         | 35             | 5.2                      | 1.00                   |         |
| Non-cement/non-brick             | 210            | 50.6                     | 0.77 (0.58–1.01)       | 0.065   | 93             | 21.8                     | 1.31 (0.79–2.16)       | 0.298   | 33             | 7.6                      | 0.90 (0.46–1.77)       | 0.767   |
| <b>Separate Kitchen</b>          |                |                          |                        |         |                |                          |                        |         |                |                          |                        |         |
| Yes <sup>c</sup>                 | 201            | 35.9                     | 1.00                   |         | 79             | 13.8                     | 1.00                   |         | 18             | 3.1                      | 1.00                   |         |
| No                               | 210            | 53.1                     | 1.29 (1.01–1.63)       | 0.037   | 72             | 17.6                     | 1.01 (0.70–1.46)       | 0.973   | 38             | 9.2                      | 2.12 (1.13–3.97)       | 0.019   |
| <b>Smoking status of mother</b>  |                |                          |                        |         |                |                          |                        |         |                |                          |                        |         |
| Yes <sup>c</sup>                 | 28             | 46.9                     | 1.00                   |         | 25             | 41.7                     | 1.00                   |         | 2              | 3.2                      | 1.00                   |         |
| No                               | 475            | 45.8                     | 1.30 (0.68–2.48)       | 0.429   | 169            | 15.8                     | 0.58 (0.27–1.24)       | 0.162   | 69             | 6.4                      | 2.00 (0.27–14.76)      | 0.496   |

<sup>a</sup> n = number of mortality cases for neonatal, post-neonatal and child age-groups;

<sup>b</sup> odds ratio adjusted for wealth index, place of residence, mother's age, mother's education, mother's working status, sex of child, breastfeeding status, household's floor material, household's wall material, separate kitchen in the house and smoking status of mother;

<sup>c</sup> reference category,

<sup>d</sup> clean fuels: electricity, liquid petroleum gas (LPG), natural gas, biogas,

<sup>e</sup> Polluting fuels: kerosene, coal/lignite, charcoal, wood, straw/shrubs/grass and animal dung.

doi:10.1371/journal.pone.0173256.t001

Similarly, analyses combining location of kitchen (separate room used as kitchen or not) and use of cooking fuel showed strong associations for households who used polluting fuels and had no separate kitchen (compared to households with a separate kitchen who used clean fuel for cooking), for child mortality (OR = 7.63, 95%CI = 2.08–27.95,  $P = 0.002$ ), and associations of a smaller magnitude for under-five mortality (OR = 1.88, 95%CI = 1.40–2.53,  $P < 0.001$ ), post-neonatal mortality (OR = 1.78, 95%CI = 1.01–3.14,  $P = 0.045$ ) and neonatal mortality (OR = 1.62, 95%CI = 1.14–2.31,  $P = 0.007$ ) (Tables 2 & 3).

## Discussion

Findings from this study suggested that HAP from cooking fuel was associated with neonatal, post-neonatal, child and under-five mortality after adjusting for covariates. The risk of death among young children was higher in post-neonatal and children aged 1 to 4 years than in the neonatal age group, which was generally consistent with previous population-based studies in India and Nigeria [20, 23, 26]. The risk of under-five mortality in each separate age group was higher in households without a separate kitchen for cooking their meals compared to those with separate/outdoor kitchen. In addition, the lower risk of mortality was evident in children whose mothers ever breastfed compared to never breastfed children, consistent with its previously reported protective role in respiratory outcomes in young children [32, 34–36]. Unprocessed solid fuels when burnt in open fire contain a large amount of key pollutants such as fine

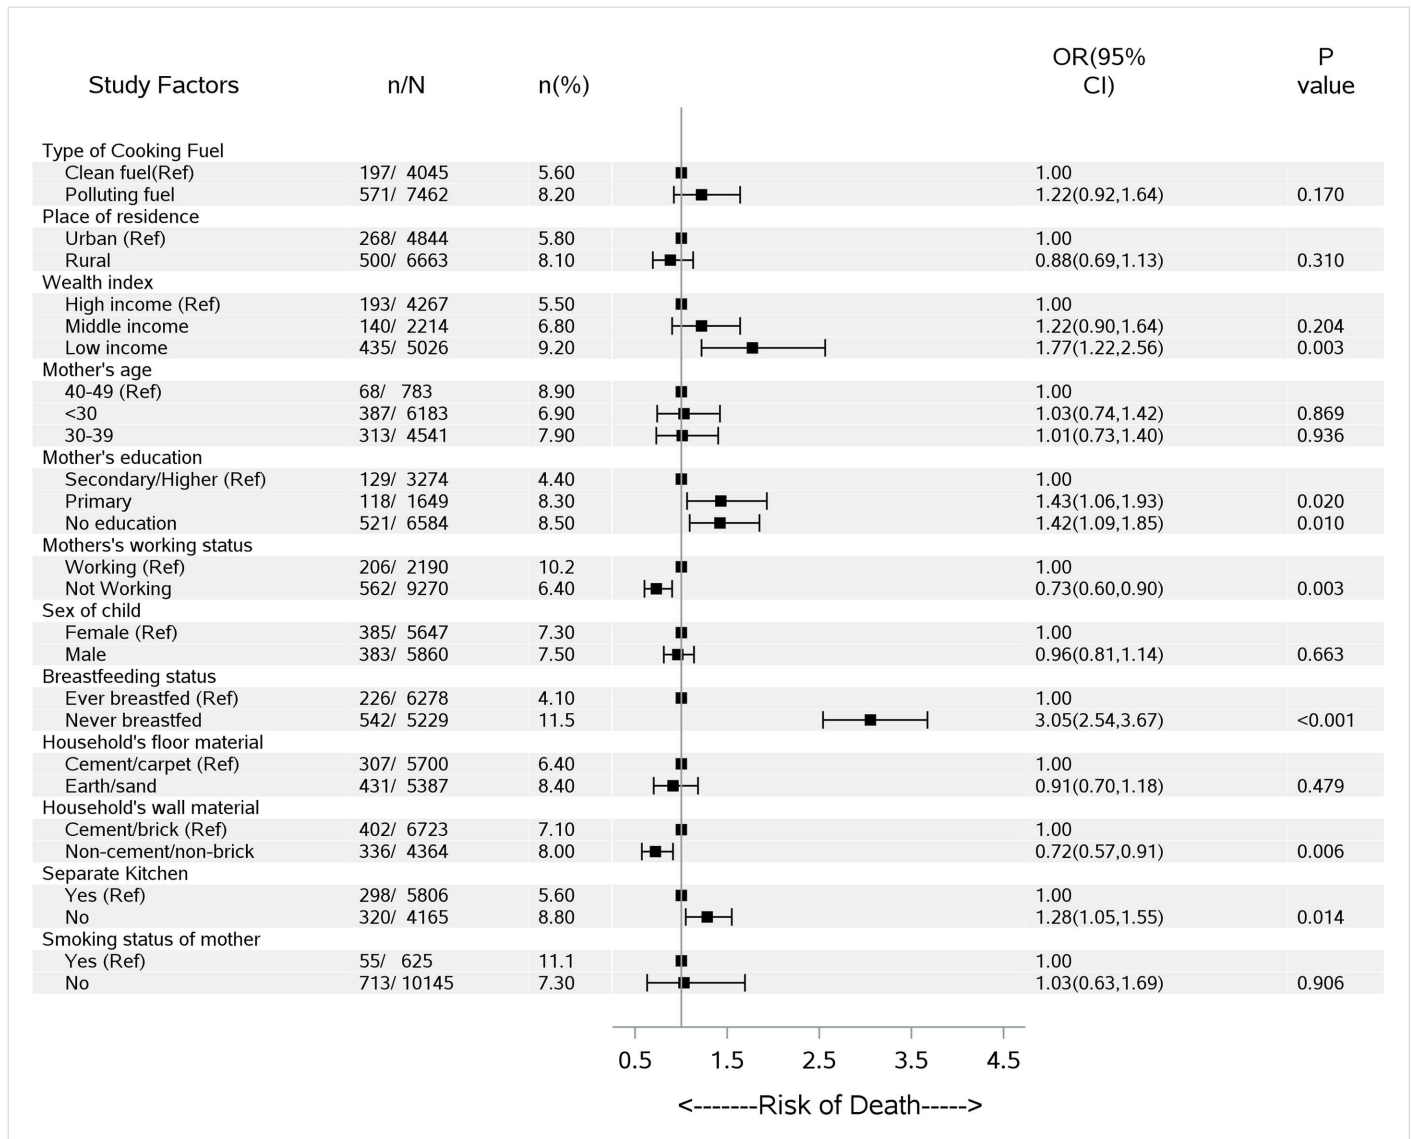

**Fig 1. Use of cooking fuel associated with total under-five mortality in Pakistan.** Ref = Reference category; n = number of under-five mortality cases and N = total number of under-five children; n(%) = weighted incidence proportion of under-five mortality cases; OR (95% CI) = odds ratio adjusted for wealth index, place of residence, mother's age, education and working status, sex of child, breastfeeding status, household's floor material and wall material, location of kitchen and smoking status of mother; clean fuels = electricity, liquid petroleum gas (LPG), natural gas, biogas; Polluting fuels = kerosene, coal/lignite, charcoal, wood, straw/shrubs/grass and animal dung.

doi:10.1371/journal.pone.0173256.g001

particles, carbon monoxide (CO) and a number of other chemicals compared to clean (LPG/ natural gas, biogas) cooking fuels, thus increases the risk of respiratory infections and death of children under-five years of age as air intake of an infant is approximately twice that of adults which result in inhaling more pollutants present into the indoor air [43].

This study is the first national evaluation of HAP and under-five mortality in Pakistan. The study found urban children were at slightly higher risk of death than children from rural areas, which was similar to previous similar studies in Bangladesh and Indonesia [24, 25]; despite the fact that the majority of the households in rural Pakistan rely on solids fuels mainly due to the unavailability of better alternatives [44, 45]. An intervention study in Pakistan investigating

**Table 2. Risk of neonatal and post-neonatal mortality by breastfeeding status and kitchen location.**

| Study Factors                                                                           | Neonatal       |                         |                         |         | Post-neonatal  |                         |                         |         |
|-----------------------------------------------------------------------------------------|----------------|-------------------------|-------------------------|---------|----------------|-------------------------|-------------------------|---------|
|                                                                                         | n <sup>a</sup> | Deaths/1000 live births | OR <sup>b</sup> 95%(CI) | P value | n <sup>a</sup> | Deaths/1000 live births | OR <sup>b</sup> 95%(CI) | P value |
| <b>Combined Association of Breastfeeding Status and Use of Cooking fuel<sup>f</sup></b> |                |                         |                         |         |                |                         |                         |         |
| Ever breastfed & used clean fuels <sup>c,d</sup>                                        | 40             | 20.3                    | 1.00                    |         | 16             | 8.0                     | 1.00                    |         |
| Ever breastfed & used polluting fuels <sup>e</sup>                                      | 97             | 23.2                    | 0.94 (0.60–1.46)        | 0.771   | 44             | 10.4                    | 1.19 (0.61–2.33)        | 0.608   |
| Never breastfed & used clean fuels <sup>d</sup>                                         | 96             | 49.4                    | 2.55 (1.70–3.81)        | <0.001  | 33             | 16.5                    | 1.76 (0.91–3.39)        | 0.092   |
| Never breastfed & used polluting fuels <sup>e</sup>                                     | 270            | 92.4                    | 3.34 (2.21–5.04)        | <0.001  | 101            | 32.7                    | 3.39 (1.81–6.36)        | <0.001  |
| <b>Combined Association of Kitchen Location and Use of Cooking fuel<sup>g</sup></b>     |                |                         |                         |         |                |                         |                         |         |
| Separate kitchen used clean fuels <sup>c,d</sup>                                        | 91             | 33.2                    | 1.00                    |         | 29             | 10.3                    | 1.00                    |         |
| Separate kitchen used polluting fuels <sup>e</sup>                                      | 110            | 38.4                    | 1.10 (0.78–1.55)        | 0.598   | 50             | 17.1                    | 1.58 (0.92–2.72)        | 0.100   |
| No separate kitchen used clean fuels <sup>d</sup>                                       | 31             | 40.4                    | 1.19 (0.77–1.84)        | 0.439   | 10             | 12.7                    | 1.03 (0.49–2.18)        | 0.940   |
| No separate kitchen used polluting fuels <sup>e</sup>                                   | 179            | 56.2                    | 1.62 (1.14–2.31)        | 0.007   | 62             | 18.8                    | 1.78 (1.01–3.14)        | 0.045   |

<sup>a</sup> n = number of mortality cases for neonatal and post-neonatal age-groups;

<sup>b</sup> adjusted odds ratio;

<sup>c</sup> reference category;

<sup>d</sup> clean fuels: electricity, liquid petroleum gas (LPG), natural gas, biogas;

<sup>e</sup> Polluting fuels: kerosene, coal/lignite, charcoal, wood, straw/shrubs/grass and animal dung;

<sup>f</sup> analyses adjusted for mother’s age, mother’s education, place of residence and location of kitchen and

<sup>g</sup> analyses adjusted for mother’s age, mother’s education, place of residence and breastfeeding status.

doi:10.1371/journal.pone.0173256.t002

indoor particulate matter (PM) concentrations in developing countries reported that PM was considerably higher in urban kitchens as rural kitchens were more ventilated than urban ones [46]. Other studies from Pakistan have also reported that females were more likely to be responsible for cooking and that maternal education level and household wealth could influence the choice of household fuel type, with the usage of clean fuel lower in poorer households in both urban and rural areas [44, 45]. Similar findings were also evident in the present study for mortality outcomes associated with HAP.

Breastfeeding has previously been acknowledged to protect infants against infection and has been reported as a protecting factor for reducing the risk of respiratory illness among infants [32, 35, 36]. Thus breastfeeding status of children was investigated to determine whether it reduced the association between HAP and under-five mortality, a mechanism not previously investigated in any study in Pakistan. This present study identified that the risk of under-five mortality associated with the use of cooking fuel was higher in children aged 1 to 4 years compared to post-neonatal and neonatal age groups, and was stronger in children whose mother did not breastfeed. Breastfeeding in the first one year of life period may substantially reduce the risk of mortality among young children even among those exposed to HAP [23, 25, 26]. The recent PDHS data used in this study indicated that 94% of children were reported to have been breastfed at some time [1], that might be the cause of lower risk of neonatal and post-neonatal mortality associated with HAP in Pakistan.

A number of previous studies from developing countries (such as African countries, India, and Bangladesh) also examined the role of kitchen location in the house for the



**Table 3. Risk of child and under-five mortality by breastfeeding status and kitchen location.**

| Study Factors                                                                           | Child          |                         |                         |         | Under-five     |                         |                         |         |
|-----------------------------------------------------------------------------------------|----------------|-------------------------|-------------------------|---------|----------------|-------------------------|-------------------------|---------|
|                                                                                         | n <sup>a</sup> | Deaths/1000 live births | OR <sup>b</sup> 95%(CI) | P value | n <sup>a</sup> | Deaths/1000 live births | OR <sup>b</sup> 95%(CI) | P value |
| <b>Combined Association of Breastfeeding Status and Use of Cooking fuel<sup>f</sup></b> |                |                         |                         |         |                |                         |                         |         |
| Ever breastfed & used clean fuels <sup>c,d</sup>                                        | 4              | 2.0                     | 1.00                    |         | 60             | 30.8                    | 1.00                    |         |
| Ever breastfed & used polluting fuels <sup>e</sup>                                      | 25             | 5.9                     | 2.42 (0.67–8.80)        | 0.179   | 166            | 40.4                    | 1.09 (0.76–1.57)        | 0.631   |
| Never breastfed & used clean fuels <sup>d</sup>                                         | 8              | 3.9                     | 2.41 (0.60–9.72)        | 0.217   | 137            | 72.1                    | 2.38 (1.70–3.33)        | <0.001  |
| Never breastfed & used polluting fuels <sup>e</sup>                                     | 34             | 10.8                    | 5.11 (1.44–18.17)       | 0.012   | 405            | 145.4                   | 3.65 (2.60–5.12)        | <0.001  |
| <b>Combined Association of Kitchen Location and Use of Cooking fuel<sup>g</sup></b>     |                |                         |                         |         |                |                         |                         |         |
| Separate kitchen used clean fuels <sup>c,d</sup>                                        | 3              | 1.1                     | 1.00                    |         | 123            | 45.4                    | 1.00                    |         |
| Separate kitchen used polluting fuels <sup>e</sup>                                      | 15             | 5.1                     | 4.11 (1.11–15.23)       | 0.035   | 175            | 62.6                    | 1.32 (0.99–1.76)        | 0.061   |
| No separate kitchen used clean fuels <sup>d</sup>                                       | 6              | 7.6                     | 5.28 (1.28–21.69)       | 0.021   | 47             | 62.5                    | 1.27 (0.8681.83)        | 0.195   |
| No separate kitchen used polluting fuels <sup>e</sup>                                   | 32             | 9.6                     | 7.63 (2.08–27.95)       | 0.002   | 273            | 88.3                    | 1.88 (1.40–2.53)        | <0.001  |

<sup>a</sup> n = number of mortality cases for child and under-five age-groups;

<sup>b</sup> adjusted odds ratio;

<sup>c</sup> reference category;

<sup>d</sup> clean fuels: electricity, liquid petroleum gas (LPG), natural gas, biogas;

<sup>e</sup> Polluting fuels: kerosene, coal/lignite, charcoal, wood, straw/shrubs/grass and animal dung;

<sup>f</sup> analyses adjusted for mother’s age, mother’s education, place of residence and location of kitchen and

<sup>g</sup> analyses adjusted for mother’s age, mother’s education, place of residence and breastfeeding status.

doi:10.1371/journal.pone.0173256.t003

association between HAP and under-five mortality.[25, 26, 28] Findings from these studies were consistent with observed associations in the present study. Findings from the present study showed a greater risk of neonatal, post-neonatal, child and under-five mortality when mothers reported no separate kitchen in the house and used polluting fuels for cooking, and also found increased risk of childhood mortality even where clean fuels were used but no separate kitchen in the house. Households without a separate kitchen have a higher level of concentrations of PM, and young children are exposed to HAP as they spend many hours inside the house [47].

A number of methodological limitations that were taken into account when interpreting the results of this present study. First, the classification of cooking fuel may be a source of misclassification bias as some households use a combination of different fuels. The DHS only collected information of primary fuel use, no information on secondary fuel use was available. In addition, this study also did not account for past exposure to cooking fuel or recent changes in cooking methods. A recent study of rural areas in Pakistan indicated that majority of households used both fuels even where clean fuels were available. For example, households used LPG, but reduced fuel expenses by also using solid fuels as they were cheaper and more widely available (e.g. dung and crop residues) [45].

Second, there may be a source of recall bias as information on birth and death of children was based on interviews with mothers. Analyses were restricted to those children born within a five-year period prior to the survey date in order to minimise the likelihood of recall bias, but maximise the number of cases of death for analysis. An index period of 1-year

period would reduce recall bias further, but also reduce the number of cases available for analysis; an index period of >5 years would increase the number of available cases for analysis, but also increase the likelihood of recall bias associated with those cases. It is also difficult to clearly define temporal relationships between the exposure (use of cooking fuel) and outcome (mortality) when collected at the same point in time, as the PDHS is cross-sectional design. Moreover, all-cause mortality was considered for our analyses of the association between HAP from cooking fuel and under-five mortality. There are also other important factors (such as preterm birth complications, low birth weight, nutritional conditions, and diarrhoea) along with respiratory illnesses that affect mortality among under-five children. However, cause-specific mortality could not be investigated in the present study due to the absence of this information in the PDHS dataset. Lower respiratory infection was the leading cause of death in children under five years of age in Pakistan [13] and HAP is mostly associated with respiratory illness. Nevertheless, counting all-cause mortality will also include mortality outcomes not associated with HAP from cooking fuel, which is likely to be a reason for ascertainment bias in the mortality outcomes which leads to an underestimation of the association between use of cooking fuel and the cause-specific outcomes noted above. In addition, this study also did not measure actual levels and patterns of exposure to emission from cooking smoke due to the lack of such objective measures in DHS data. Other important covariates, for example, “cooking under chimney” and “presence of windows in cooking area”, have been noted in previous studies [27, 28]; however, this information was not measured in the PDHS 2013 dataset.

Notwithstanding these methodological limitations, this present study was based on nationally representative survey data which has a very high response rate of 93.1%. This was also the first national level study in Pakistan to examine the association between HAP from cooking fuel and under-five mortality and assess the role of environmental and behavioural factors that may be points of effective intervention. The majority of the households in Pakistan still depend on polluting fuels (such as solid fuels, kerosene etc.) in both urban and rural areas [1, 2]; therefore, HAP remains a common exposure in the population and consequently, the population attributable risk of this avoidable risk factor remains an important public health issue for Pakistan.

Awareness-raising programs regarding the health risk associated with HAP from the use of polluting fuels need to be focused on rural and low-income urban areas of Pakistan. Changes in energy technologies such as switching to cleaner fuels (for example, LPG/natural gas, biogas, and electricity) are the key focus of interventions relating to HAP and can lead to a substantial reduction in exposure to a range of indoor air pollutants. However, cleaner fuel is not an affordable option for many poor families in Pakistan, and policies to increase access and use to cleaner fuels will require long-term intervention, investment in infrastructure and economic development of the country [3, 45, 46]. A shorter term and cost effective alternative to this problem is the use of improved/smoke-free cooking stoves (made of clay and husk), with a stack attached to the back of the stove to release smoke outside the kitchen, and which has been trialled in intervention studies in Pakistan [44–46, 48]. These cooking stoves are a simple and cheap intervention, and also have health advantages leading to a reduction in carbon monoxide emissions and incidence of respiratory infections [3, 44, 48].

Results from this present study suggest that behavioural and health educational interventions may potentially play a significant role in reducing childhood deaths in Pakistan associated with HAP. Such behavioural interventions include promoting exclusive breastfeeding practices in the first year of life and promoting the need to keep young children separate from the cooking area while cooking with solid fuels.

## Conclusions

This current study indicates that the ubiquitous use of polluting fuels in Pakistan is associated with an increased risk of mortality in children less than five years of age. Findings suggested that breastfeeding practices, cooking in a separate kitchen and not to carrying children while cooking may be potential targets for behavioural interventions and policy responses in Pakistan.

## Supporting information

**S1 Table. Distribution of study factors associated with under-five mortality in Pakistan, 2013 Pakistan Demographic and Health Survey (PDHS).**

(DOCX)

## Acknowledgments

This study was part of the first author's thesis for a doctoral dissertation with the School of Medicine at the Western Sydney University, Australia. We are grateful to The DHS Program, ORC Macro, Calverton, Maryland, USA for providing the Pakistan DHS data for this analysis.

## Author Contributions

**Conceptualization:** SN AP.

**Data curation:** SN.

**Formal analysis:** SN.

**Investigation:** SN AP.

**Methodology:** SN AP.

**Project administration:** AP.

**Resources:** SN.

**Software:** SN AP KEA.

**Supervision:** AP KEA.

**Validation:** SN AP KEA.

**Visualization:** SN.

**Writing – original draft:** SN.

**Writing – review & editing:** SN AP KEA.

## References

1. National Institute of Population Studies II. Pakistan Demographic and Health Survey 2012–13. National Institute of Population Studies, Islamabad, Pakistan; Measure DHS, ICF International, Calverton, Maryland, USA., 2013. <https://dhsprogram.com/pubs/pdf/FR290/FR290.pdf>
2. Bhutto AW, Bazmi AA, Zahedi G. Greener energy: Issues and challenges for Pakistan—Biomass energy prospective. *Renewable and Sustainable Energy Reviews*. 2011; 15(6):3207–19.
3. Janjua N, Mahmood B, Dharma V, Sathiakumar N, Khan M. Use of biomass fuel and acute respiratory infections in rural Pakistan. *Public health*. 2012; 126(10):855–62. doi: [10.1016/j.puhe.2012.06.012](https://doi.org/10.1016/j.puhe.2012.06.012) PMID: [22889546](https://pubmed.ncbi.nlm.nih.gov/22889546/)

4. Naehler LP, Brauer M, Lipsett M, Zelikoff JT, Simpson CD, Koenig JQ, et al. Woodsmoke health effects: a review. *Inhalation toxicology*. 2007; 19(1):67–106. doi: [10.1080/08958370600985875](https://doi.org/10.1080/08958370600985875) PMID: [17127644](https://pubmed.ncbi.nlm.nih.gov/17127644/)
5. WHO. Air quality guidelines for particulate matter, ozone, nitrogen dioxide and sulfur dioxide: global update 2005: summary of risk assessment. 2006. [http://apps.who.int/iris/bitstream/10665/69477/1/WHO\\_SDE\\_PHE\\_OEH\\_06.02\\_eng.pdf](http://apps.who.int/iris/bitstream/10665/69477/1/WHO_SDE_PHE_OEH_06.02_eng.pdf)
6. Fullerton DG, Bruce N, Gordon SB. Indoor air pollution from biomass fuel smoke is a major health concern in the developing world. *Transactions of the Royal Society of Tropical Medicine and Hygiene*. 2008; 102(9):843–51. doi: [10.1016/j.trstmh.2008.05.028](https://doi.org/10.1016/j.trstmh.2008.05.028) PMID: [18639310](https://pubmed.ncbi.nlm.nih.gov/18639310/)
7. WHO. Burden of disease from Household Air Pollution for 2012: Summary of Results. 2014. [http://www.who.int/phe/health\\_topics/outdoorair/databases/FINAL\\_HAP\\_AAP\\_BoD\\_24March2014.pdf](http://www.who.int/phe/health_topics/outdoorair/databases/FINAL_HAP_AAP_BoD_24March2014.pdf)
8. Lim SS, Vos T, Flaxman AD, Danaei G, Shibuya K, Adair-Rohani H, et al. A comparative risk assessment of burden of disease and injury attributable to 67 risk factors and risk factor clusters in 21 regions, 1990–2010: a systematic analysis for the Global Burden of Disease Study 2010. *Lancet*. 2012; 380(9859):2224–60. Epub 2012/12/19. doi: [10.1016/S0140-6736\(12\)61766-8](https://doi.org/10.1016/S0140-6736(12)61766-8) PMID: [23245609](https://pubmed.ncbi.nlm.nih.gov/23245609/)
9. Munroe RL, Gauvain M. Exposure to open-fire cooking and cognitive performance in children. *International journal of environmental health research*. 2012; 22(2):156–64. doi: [10.1080/09603123.2011.628642](https://doi.org/10.1080/09603123.2011.628642) PMID: [22128885](https://pubmed.ncbi.nlm.nih.gov/22128885/)
10. Rehfuess E, Bruce N, Smith K. Solid Fuel Use: Health Effect. In: Nriagu JO (ed.) *Encyclopedia of Environmental Health*, v 5, pp. 150161 Burlington: Elsevier, 2011. *Environmental Health*. 2011;5:150161.
11. IGME U. Levels Trends in Child Mortality: Report 2015. United Nations Children's Fund, USA; World Health Organization, Switzerland; The World Bank, USA; United Nations Population Division, USA, 2015. [http://www.unicef.org/media/files/Levels\\_and\\_Trends\\_in\\_Child\\_Mortality\\_2014.pdf](http://www.unicef.org/media/files/Levels_and_Trends_in_Child_Mortality_2014.pdf)
12. Ministry of Planning DaR. Pakistan Millennium Development Goals Report 2013. Ministry of Planning, Development and Reform, Government of Pakistan, Islamabad, Pakistan, 2013. <http://www.pk.undp.org/content/dam/pakistan/docs/MDGs/MDG2013Report/final%20report.pdf>
13. IHME. Global Burden of Disease (GBD) Profile: Pakistan. Institute for Health Metrics and Evaluation, 2010. [https://www.healthdata.org/sites/default/files/files/country\\_profiles/GBD/ihme\\_gbd\\_country\\_report\\_pakistan.pdf](https://www.healthdata.org/sites/default/files/files/country_profiles/GBD/ihme_gbd_country_report_pakistan.pdf)
14. WHO. Deaths and DALYs attributable to selected environmental risk factors World Health Organization, 2009. [http://www.who.int/quantifying\\_ehimpacts/national/countryprofile/intro/en/](http://www.who.int/quantifying_ehimpacts/national/countryprofile/intro/en/)
15. Ahmed Z, Zafar M, Khan NA, Qureshi MS. Exposure to biomass fuel and low child birth weight—Findings of Pakistan Demographic and Health Survey 2006–2007. *International Journal of Health System and Disaster Management*. 2015; 3(5):19.
16. D'souza RM. Housing and environmental factors and their effects on the health of children in the slums of Karachi, Pakistan. *Journal of Biosocial Science*. 1997; 29(03):271–81.
17. Mir AA, Imtiyaz A, Fazili A, Iqbal J, Jabeen R, Salathia A. Prevalence and Risk Factor Analysis of Acute Respiratory tract Infections in Rural areas of Kashmir valley under 5 Years of Age. *Birth*. 2012; 1(320):19.46.
18. Bates MN, Chandyo RK, Valentiner-Branth P, Pokhrel AK, Mathisen M, Basnet S, et al. Acute lower respiratory infection in childhood and household fuel use in Bhaktapur, Nepal. *Environmental health perspectives*. 2013; 121(5):637. doi: [10.1289/ehp.1205491](https://doi.org/10.1289/ehp.1205491) PMID: [23512278](https://pubmed.ncbi.nlm.nih.gov/23512278/)
19. Choi J-Y, Baumgartner J, Harnden S, Alexander BH, Town RJ, D'Souza G, et al. Increased risk of respiratory illness associated with kerosene fuel use among women and children in urban Bangalore, India. *Occupational and environmental medicine*. 2015; 72(2):114–22. doi: [10.1136/oemed-2014-102472](https://doi.org/10.1136/oemed-2014-102472) PMID: [25341423](https://pubmed.ncbi.nlm.nih.gov/25341423/)
20. Epstein MB, Bates MN, Arora NK, Balakrishnan K, Jack DW, Smith KR. Household fuels, low birth weight, and neonatal death in India: the separate impacts of biomass, kerosene, and coal. *Int J Hyg Environ Health*. 2013; 216(5):523–32. Epub 2013/01/26. doi: [10.1016/j.ijheh.2012.12.006](https://doi.org/10.1016/j.ijheh.2012.12.006) PMID: [23347967](https://pubmed.ncbi.nlm.nih.gov/23347967/)
21. Wichmann J, Vuyi K. Influence of cooking and heating fuel use on 1–59 month old mortality in South Africa. *Maternal and child health journal*. 2006; 10(6):553–61. doi: [10.1007/s10995-006-0121-z](https://doi.org/10.1007/s10995-006-0121-z) PMID: [16758332](https://pubmed.ncbi.nlm.nih.gov/16758332/)
22. Bassani DG, Jha P, Dhingra N, Kumar R. Child mortality from solid-fuel use in India: a nationally-representative case-control study. *BMC public health*. 2010; 10(1):491.
23. Ezeh OK, Agho KE, Dibley MJ, Hall JJ, Page AN. The effect of solid fuel use on childhood mortality in Nigeria: evidence from the 2013 cross-sectional household survey. *Environmental Health*. 2014; 13(1):113.

24. Kashima S, Yorifuji T, Tsuda T, Ibrahim J, Doi H. Effects of traffic-related outdoor air pollution on respiratory illness and mortality in children, taking into account indoor air pollution, in Indonesia. *Journal of Occupational and Environmental Medicine*. 2010; 52(3):340–5. doi: [10.1097/JOM.0b013e3181d44e3f](https://doi.org/10.1097/JOM.0b013e3181d44e3f) PMID: [20190647](https://pubmed.ncbi.nlm.nih.gov/20190647/)
25. Naz S, Page A, Agho KE. Household Air Pollution and Under-Five Mortality in Bangladesh (2004–2011). *International journal of environmental research and public health*. 2015; 12(10):12847–62. doi: [10.3390/ijerph121012847](https://doi.org/10.3390/ijerph121012847) PMID: [26501296](https://pubmed.ncbi.nlm.nih.gov/26501296/)
26. Naz S, Page A, Agho KE. Household air pollution and under-five mortality in India (1992–2006). *Environmental Health*. 2016; 15(1):1.
27. Pandey S, Lin Y. Adjusted effects of domestic violence, tobacco use, and indoor Air pollution from use of solid fuel on child mortality. *Maternal and child health journal*. 2013; 17(8):1499–507. doi: [10.1007/s10995-012-1163-z](https://doi.org/10.1007/s10995-012-1163-z) PMID: [23065299](https://pubmed.ncbi.nlm.nih.gov/23065299/)
28. Rehfuess EA, Tzala L, Best N, Briggs DJ, Joffe M. Solid fuel use and cooking practices as a major risk factor for ALRI mortality among African children. *Journal of epidemiology and community health*. 2009; 63(11):887–92. doi: [10.1136/jech.2008.082685](https://doi.org/10.1136/jech.2008.082685) PMID: [19468017](https://pubmed.ncbi.nlm.nih.gov/19468017/)
29. Rinne ST, Rodas EJ, Rinne ML, Simpson JM, Glickman LT. Use of biomass fuel is associated with infant mortality and child health in trend analysis. *The American journal of tropical medicine and hygiene*. 2007; 76(3):585–91. Epub 2007/03/16. PMID: [17360888](https://pubmed.ncbi.nlm.nih.gov/17360888/)
30. Tielsch JM, Katz J, Thulasiraj RD, Coles CL, Sheeladevi S, Yanik EL, et al. Exposure to indoor biomass fuel and tobacco smoke and risk of adverse reproductive outcomes, mortality, respiratory morbidity and growth among newborn infants in south India. *International journal of epidemiology*. 2009; 38(5):1351–63. doi: [10.1093/ije/dyp286](https://doi.org/10.1093/ije/dyp286) PMID: [19759098](https://pubmed.ncbi.nlm.nih.gov/19759098/)
31. Filmer D, Pritchett LH. Estimating wealth effects without expenditure data—or tears: an application to educational enrollments in states of India. *Demography*. 2001; 38(1):115–32. Epub 2001/03/03. PMID: [11227840](https://pubmed.ncbi.nlm.nih.gov/11227840/)
32. Arifeen S, Black RE, Antelman G, Baqui A, Caulfield L, Becker S. Exclusive breastfeeding reduces acute respiratory infection and diarrhea deaths among infants in Dhaka slums. *Pediatrics*. 2001; 108(4):e67–e. PMID: [11581475](https://pubmed.ncbi.nlm.nih.gov/11581475/)
33. Black RESSJ. Where and why are 10 million children dying every year? *Lancet*. 2003; 361(9376):2226. doi: [10.1016/S0140-6736\(03\)13779-8](https://doi.org/10.1016/S0140-6736(03)13779-8) PMID: [12842379](https://pubmed.ncbi.nlm.nih.gov/12842379/)
34. Cushing AH, Samet JM, Lambert WE, Skipper BJ, Hunt WC, Young SA, et al. Breastfeeding reduces risk of respiratory illness in infants. *American journal of epidemiology*. 1998; 147(9):863–70. PMID: [9583717](https://pubmed.ncbi.nlm.nih.gov/9583717/)
35. Heinig MJ. Host defense benefits of breastfeeding for the infant: effect of breastfeeding duration and exclusivity. *Pediatric Clinics of North America*. 2001; 48(1):105–23. PMID: [11236719](https://pubmed.ncbi.nlm.nih.gov/11236719/)
36. Victoria C. Effect of breastfeeding on infant and child mortality due to infectious diseases in less developed countries: a pooled analysis. *Lancet (British edition)*. 2000; 355(9202):451–5.
37. Dasgupta S, Huq M, Khaliqzaman M, Pandey K, Wheeler D. Indoor air quality for poor families: new evidence from Bangladesh. *Indoor Air*. 2006; 16(6):426–44. Epub 2006/11/15. doi: [10.1111/j.1600-0668.2006.00436.x](https://doi.org/10.1111/j.1600-0668.2006.00436.x) PMID: [17100664](https://pubmed.ncbi.nlm.nih.gov/17100664/)
38. Gurley E, Homaira N, Salje H, Ram P, Haque R, Petri W, et al. Indoor exposure to particulate matter and the incidence of acute lower respiratory infections among children: A birth cohort study in urban Bangladesh. *Indoor air*. 2013; 23(5):379–86. doi: [10.1111/ina.12038](https://doi.org/10.1111/ina.12038) PMID: [23906055](https://pubmed.ncbi.nlm.nih.gov/23906055/)
39. Khalequzzaman M, Kamijima M, Sakai K, Chowdhury NA, Hamajima N, Nakajima T. Indoor air pollution and its impact on children under five years old in Bangladesh. *Indoor Air*. 2007; 17(4):297–304. Epub 2007/07/31. doi: [10.1111/j.1600-0668.2007.00477.x](https://doi.org/10.1111/j.1600-0668.2007.00477.x) PMID: [17661926](https://pubmed.ncbi.nlm.nih.gov/17661926/)
40. Khalequzzaman M, Kamijima M, Sakai K, Ebara T, Hoque BA, Nakajima T. Indoor air pollution and health of children in biomass fuel-using households of Bangladesh: comparison between urban and rural areas. *Environmental health and preventive medicine*. 2011; 16(6):375–83. Epub 2011/03/25. doi: [10.1007/s12199-011-0208-z](https://doi.org/10.1007/s12199-011-0208-z) PMID: [21431808](https://pubmed.ncbi.nlm.nih.gov/21431808/)
41. Khalequzzaman M, Kamijima M, Sakai K, Hoque BA, Nakajima T. Indoor air pollution and the health of children in biomass-and fossil-fuel users of Bangladesh: situation in two different seasons. *Environmental health and preventive medicine*. 2010; 15(4):236–43. doi: [10.1007/s12199-009-0133-6](https://doi.org/10.1007/s12199-009-0133-6) PMID: [21432551](https://pubmed.ncbi.nlm.nih.gov/21432551/)
42. Rutstein SO, Rojas G. Guide to DHS statistics. Calverton, MD: ORC Macro. 2006. [http://www.dhsprogram.com/pubs/pdf/DHSG1/Guide\\_to\\_DHS\\_Statistics\\_29Oct2012\\_DHSG1.pdf](http://www.dhsprogram.com/pubs/pdf/DHSG1/Guide_to_DHS_Statistics_29Oct2012_DHSG1.pdf)
43. J. Pronczuk-Garbino M, WHO. Children’s health and the environment. A global perspective. A RESOURCE MANUAL FOR THE HEALTH SECTOR 2005.

44. Jan I. What makes people adopt improved cookstoves? Empirical evidence from rural northwest Pakistan. *Renewable and sustainable energy reviews*. 2012; 16(5):3200–5.
45. Nasir ZA, Murtaza F, Colbeck I. Role of poverty in fuel choice and exposure to indoor air pollution in Pakistan. *Journal of Integrative Environmental Sciences*. 2015; 12(2):107–17.
46. Nasir ZA, Colbeck I, Ali Z, Ahmad S. Indoor particulate matter in developing countries: a case study in Pakistan and potential intervention strategies. *Environmental Research Letters*. 2013; 8(2):024002.
47. Prasad R, Singh A, Garg R, Hosmane GB. Biomass fuel exposure and respiratory diseases in India. *Drug Discoveries & Therapeutics*. 2012; 6(5).
48. Khushk WA, Fatmi Z, White F, Kadir MM. Health and social impacts of improved stoves on rural women: a pilot intervention in Sindh, Pakistan. *Indoor air*. 2005; 15(5):311–6. doi: [10.1111/j.1600-0668.2005.00367.x](https://doi.org/10.1111/j.1600-0668.2005.00367.x) PMID: [16108903](https://pubmed.ncbi.nlm.nih.gov/16108903/)
